# Supplementary material
Source: PubMed Central journal article supplement (PMC1941484)
Supplement: pnas_0701635104_1.pdf [file pnas_0701635104_1.pdf]

**Table 2.** Oligonucleotides used in the detection of promoter associated RNA and mRNA in various RNAPII promoters EF1a, CCR5 (promoter associated RNA and GFP mRNA), p16, RASSF1A, NF- $\kappa$ B (p105 subunit), and Cyclin D1 promoter-specific and mRNA-specific oligonucleotides used in this study.

| Primer                                                                  | Sequence                             |
|-------------------------------------------------------------------------|--------------------------------------|
| <b>EF1-alpha pRNA and mRNA specific oligonucleotides</b>                |                                      |
| 803 (EF1a pRNA)                                                         | 5'-AAGTGGGGGGAGGGGTCGGCA-3'          |
| 804 (EF1a mRNA)                                                         | 5'-GCACTTACCTGTGTCTGGCGGC-3'         |
| 805 (EF1a pRNA)                                                         | 5'-GAAAAAAGAACGTTACGGCGACTA-3'       |
| EFpRNAFor (EF1a pRNA)                                                   | 5'-GGAGGGGTCGGCAATTGAAC-3'           |
| EFpRNARev (EF1a pRNA)                                                   | 5'-GGAGCCAGTACACGACATCAC-3'          |
| 1064F (EF1a mRNA)                                                       | 5'-CTGAACCATCCAGGCCAAAT-3'           |
| 1128R (EF1a mRNA)                                                       | 5'-ATGTGAGCCGTGTGGCAAT-3'            |
| 3'RACE F                                                                | 5'-CACAGTCCCCGAGAAGTTG-3'            |
| EF0108F2 (EF1a mRNA)                                                    | 5'-ACCCCTAAAAGCCAAAATGG-3'           |
| EF0108R (EF1a mRNA)                                                     | 5'-CCCGAATCTACGTGTCCAAT-3'           |
| <b>CCR5 pRNA and mRNA specific oligonucleotides</b>                     |                                      |
| 5-R5-CHIP-2 (CCR5 pRNA)                                                 | 5'-GGGGTCTCATTTGCCTTCTTAGAGATCACA-3' |
| 3-R5-CHIP-3 (CCR5 pRNA)                                                 | 5'-TAAGTATATGGTCAAGTTCAGGTTC-3'      |
| 5'CCR5 (CCR5 mRNA)                                                      | 5'-GCTCTCATTTTCCATACAGTCAGT-3'       |
| 3'CCR5 (CCR5 mRNA)                                                      | 5'-TTTTAGGATTCCCGAGTAGCAGA-3'        |
| <b>p16 pRNA and mRNA specific oligonucleotides</b>                      |                                      |
| 5'-p16 (p16 pRNA)                                                       | 5'-AGGAATCCTTTGAACTAGGGTTTC-3'       |
| 3'-p16 (p16 pRNA)                                                       | 5'-TCACCTGTACGACTAAGAAAGTGT-3'       |
| 5'-p16mRNA (p16 mRNA)                                                   | 5'-CCCCTTGCCTGGAAAGATAACC-3'         |
| 3'-p16mRNA (p16 mRNA)                                                   | 5'-CTTTCTTCTCCGGTGCTGG-3'            |
| <b>RASSF1A pRNA and mRNA specific oligonucleotides</b>                  |                                      |
| 5'RasP (RASSF1A pRNA)                                                   | 5'-GCCTCCAGAAACACGGGTATC-3'          |
| 3'RasP (RASSF1A pRNA)                                                   | 5'-TTGCCCTTCCTTCCCTCCTT-3'           |
| 5'RasM (RASSF1A mRNA)                                                   | 5'-GCCGCCAGAAGATCCAAGAG-3'           |
| 3'RasM (RASSF1A mRNA)                                                   | 5'-CTGTCACACTCACACGGCAC-3'           |
| 5'ras-1 (RASSF1A pRNA)                                                  | 5'-GAAGGAAGGGCAAGGCGGGGGGGCTCTGC-3'  |
| 3'ras-1 (RASSF1A pRNA)                                                  | 5'-GGCCCGTTGGGCCCGTGTTCGCT-3'        |
| 5'RF1A (RASSF1A mRNA)                                                   | 5'-TGGTGCGACCTCTGTGGCGACTT-3'        |
| 3' RT4 (RASSF1A mRNA)                                                   | 5'-GATGAAGCCTGTGTAAGAACCGTCCT-3'     |
| <b>NF-<math>\kappa</math>B (p105 subunit) specific oligonucleotides</b> |                                      |
| 5'p105P (p105 pRNA)                                                     | 5'-GCTATGGACCGCATGACTCTATC-3'        |
| 3'p105P (p105 pRNA)                                                     | 5'-AATCAATGGTCGGGGAACGC-3'           |
| 5'p105M (p105 mRNA)                                                     | 5'-ACCCTGACCTTGCTATTTGC-3'           |
| 3'p105M (p105 mRNA)                                                     | 5'-CCGGAAGAAAAGCTGTAAACATGA-3'       |
| <b>Cyclin D1 pRNA and mRNA specific Oligonucleotides</b>                |                                      |
| 5'CycD1p (CyclinD1 pRNA)                                                | 5'-GAAGATGCAGTCGCTGAGATTCT-3'        |
| 3'CycD1p (CyclinD1 pRNA)                                                | 5'-CCTGGGGAGACCACGAGAAG-3'           |
| 5'CycD1m (CyclinD1 mRNA)                                                | 5'-CTGAGGAGCCCCAACAACCTTC-3'         |
| 3'CycD1m (CyclinD1 mRNA)                                                | 5'-CAGTCCGGTCACTTGTATC-3'            |
